# Supplementary material
Source: PubMed Central journal article supplement (PMC9750849)
Supplement: BLOOD_BLD-2022-015721-mmc1.pdf [file BLOOD_BLD-2022-015721-mmc1.pdf]

Supplemental Materials

**Clonal Hematopoiesis Is Not Significantly Associated with Covid-19 Disease Severity**

Yifan Zhou<sup>1,2,3</sup>, Ruba Shalhoub<sup>4</sup>, Stephanie N. Rogers<sup>1</sup>, Shiqin Yu<sup>2</sup>, Muxin Gu<sup>1,3</sup>, Margarete A. Fabre<sup>1,3,5</sup>, Pedro M Quiros<sup>1,3</sup>, Arch Diangson<sup>6</sup>, Wenhan Deng<sup>6</sup>, Shubha Anad<sup>6</sup>, Wenhua Lu<sup>7</sup>, Matthew Cullen<sup>7</sup>, Anna L. Godfrey<sup>8</sup>, Jacobus Preller<sup>9</sup>, Jerome Hadjadj<sup>10</sup>, Emmanuelle Jouanguy<sup>11,12</sup>, Aurélie Cobat<sup>11,12</sup>, Laurent Abel<sup>11,12,13</sup>, Frederic Rieux-Laucat<sup>14</sup>, Benjamin Terrier<sup>10</sup>, Alain Fischer<sup>15,16</sup>, Lara Novik<sup>17</sup>, Ingelise J. Gordon<sup>17</sup>, Larisa Strom<sup>17</sup>, Martin R. Gaudinski<sup>17</sup>, Andrea Lisco<sup>18</sup>, Irini Sereti<sup>18</sup>, Thomas J. Gniadek<sup>19</sup>, Andrea Biondi<sup>20</sup>, Paolo Bonfanti<sup>21</sup>, Luisa Imberti<sup>22</sup>, Clifton L. Dalgard<sup>23</sup>, Yu Zhang<sup>24,25</sup>, Kerry Dobbs<sup>25</sup>, Helen C. Su<sup>24,25,26</sup>, Luigi D. Notarangelo<sup>24,25</sup>, COVID-STORM Clinicians; NIAID Immune Response to COVID Group, The ISARIC4C Investigators<sup>a</sup>, Colin O. Wu<sup>4</sup>, Peter J. M. Openshaw<sup>27</sup>, Malcolm G. Semple<sup>28</sup>, Ziad Mallat<sup>29,30,31,\*</sup>, Kenneth Baillie<sup>32,33,34,\*</sup>, Cynthia.E.Dunbar<sup>2\*</sup>, George S. Vassiliou<sup>1,3,5,\*</sup>

## **Supplemental Note**

### **Patients and Ethical Approval**

The study included 568 patients with laboratory confirmed SARS-CoV2 infection between January and June 2020, whose blood samples were collected during the same time, upon informed consent and according to protocols approved by local institutional review boards (IRBs): Northshore University HealthSystem, Chicago, U.S.A (protocol EH20-170); University of Milano Bicocca-San Gerardo Hospital, Monza, and Ethics Committee of the National Institute of Infectious Diseases ‘Lazzaro Spallanzani’, Italy (protocol 84/2020); National Institutes of Health VRC 200 (NCT00067054); ASST Spedali Civili of Brescia, Italy (Comitato Etico Provinciale: NP 4000 Studio CORONAlab and NP 4408 – Studio CORONAlabF); National Institutes of Health CALYPSO protocol (NCT04401436); International Severe Acute Respiratory Infection Consortium Clinical Characterisation Protocol UK (ISARIC4C, ethical approval was given by the South Central Oxford C Research Ethics Committee in England, 13/SC/0149, the Scotland A Research Ethics Committee, 20/SS/0028, and the WHO Ethics Review Committee, RPC571 and122RPC572, 25 April 2013). Non-hospitalized samples were collected from the Lombardy Region of Italy and centers around U.S.A. Hospitalized and ICU samples were collected throughout centers in the U.K. Research studies with these samples were conducted by protecting the rights and privacy of the study participants.

### **Detection of CH driver mutations**

Detection of driver CH mutations was performed using target enrichment with a Twist Bioscience panel targeting exons of 56 genes capturing >97% of known CH mutations.<sup>1-3</sup> Library prep was performed according to the manufacturer’s instructions. Paired-end

sequencing was performed on HiSeq4000 devices. All sequences were aligned to the GRCh38 version of the reference human genome using bwa 0.7.17 in alt contig aware mode as described before.<sup>4</sup> The generated SAM file was compressed into a BAM file and sorted by genomic position using samtools 1.9.<sup>5</sup> PCR duplicates were marked using picard's MarkDuplicates (version 2.17.0, <http://broadinstitute.github.io/picard/>). SNPs and indels were called using Shearwater (version 3.15)<sup>6,7</sup> and GATK's Mutect2 (version 4.0.3.0)<sup>8</sup> respectively, following the best practices (by default, reads with mapping quality < 30 were removed by Shearwater and < 25 by Mutect2 filtering steps). Nonsynonymous coding variants were filtered for: 1) minimal 4 reads in each direction; 2) minimal VAF of 1%; 3) maximum VAF of 40%; 4) a minor allele frequency in the SNP databases (1000 Genome global minor allele frequency, gnomAD (exomes) allele frequencies) < 0.1 % unless with a COSMIC occurrence of 100 or more.

## Supplemental Tables

Supplemental Table S1. Target genes of bait capture set

|               |              |                |              |
|---------------|--------------|----------------|--------------|
| <i>ASXL1</i>  | <i>ETV6</i>  | <i>MPL</i>     | <i>SF1</i>   |
| <i>BCORL1</i> | <i>EZH2</i>  | <i>MYD88</i>   | <i>SF3A1</i> |
| <i>BCOR</i>   | <i>FLT3</i>  | <i>NOTCH1</i>  | <i>SF3B1</i> |
| <i>BRAF</i>   | <i>GATA2</i> | <i>NPM1</i>    | <i>SMC1A</i> |
| <i>BRCC3</i>  | <i>GNAS</i>  | <i>NRAS</i>    | <i>SMC3</i>  |
| <i>CALR</i>   | <i>GNB1</i>  | <i>PHF6</i>    | <i>SRSF2</i> |
| <i>CBL</i>    | <i>IDH1</i>  | <i>PIGA</i>    | <i>STAG2</i> |
| <i>CREBBP</i> | <i>IDH2</i>  | <i>PPM1D</i>   | <i>STAT3</i> |
| <i>CREBPA</i> | <i>JAK2</i>  | <i>PRPF40B</i> | <i>TET2</i>  |
| <i>CSF1R</i>  | <i>JAK3</i>  | <i>PTEN</i>    | <i>TP53</i>  |
| <i>CSF3R</i>  | <i>KDM6A</i> | <i>PTPN11</i>  | <i>U2AF1</i> |
| <i>CTCF</i>   | <i>KIT</i>   | <i>RAD21</i>   | <i>U2AF2</i> |
| <i>CUX1</i>   | <i>KMT2A</i> | <i>RUNX1</i>   | <i>WT1</i>   |
| <i>DNMT3A</i> | <i>KRAS</i>  | <i>SETBP1</i>  | <i>ZRSR2</i> |

Supplemental Table S2. CH Driver classification

| Gene name | Criteria for classification as a driver mutation                                                                                                | Transcript   |
|-----------|-------------------------------------------------------------------------------------------------------------------------------------------------|--------------|
| ASXL1     | Frameshift/nonsense/splice-site in exon 11-12                                                                                                   | NM_015338    |
| BCOR      | Frameshift/nonsense/splice-site                                                                                                                 | NM_001123385 |
| BCORL1    | Frameshift/nonsense/splice-site                                                                                                                 | NM_021946    |
| BRAF      | Missense in aa range p.590-615; Missense at G469                                                                                                | NM_004333    |
| BRCC3     | Frameshift/nonsense/splice-site                                                                                                                 | NM_024332    |
| CALR      | Frameshift in exon 9                                                                                                                            | NM_004343    |
| CBL       | Missense in Linker/RING finger domains (p.345-434)                                                                                              | NM_005188    |
| CEBPA     | Frameshift/nonsense/splice-site                                                                                                                 | NM_004364    |
| CREBBP    | Frameshift/nonsense/splice-site                                                                                                                 | NM_004380    |
| CSF1R     | Missense at L301 / Y969                                                                                                                         | NM_005211    |
| CSF3R     | T615A, T618I, truncating c.741-791                                                                                                              | NM_000760    |
| CTCF      | Frameshift/nonsense/splice-site, R377C, R377H, P378A, P378L                                                                                     | NM_006565    |
| CUX1      | Frameshift/nonsense/splice-site                                                                                                                 | NM_181552    |
| DNMT3A    | Frameshift/nonsense/splice-site; Missense in PWWP (p.292-350) / ADD (p.482-614) / MTase (p.634-912) domains                                     | NM_022552    |
| ETV6      | Frameshift/nonsense/splice-site                                                                                                                 | NM_001987    |
| EZH2      | Frameshift/nonsense/splice-site; Missense in SET domain (p.617-732)                                                                             | NM_001203247 |
| FLT3      | V579A, V592A, V592I, F594L, FY590-591GD, D835Y, D835H, D835E, del835                                                                            | NM_004119    |
| GATA2     | Frameshift/nonsense/splice-site, R293Q, N317H, A318T, A318V, A318G, G320D, L321P, L321F, L321V, Q328P, R330Q, R361L, L359V, A372T, R384G, R384K | NM_001145661 |
| GNAS      | Missense at R201 (844)                                                                                                                          | NM_016592    |
| GNB1      | Missense at K57 / I80                                                                                                                           | NM_002074    |
| IDH1      | Missense at R132                                                                                                                                | NM_005896    |
| IDH2      | Missense at R140 / R172                                                                                                                         | NM_002168    |
| JAK2      | V617F; Missense/indel in aa range p.536-547                                                                                                     | NM_004972    |
| JAK3      | M511T, M511I, A572V, A572T, A573V, R657Q, V715I, V715A                                                                                          | NM_000215    |

|         |                                                                                                                                                                                                                          |              |
|---------|--------------------------------------------------------------------------------------------------------------------------------------------------------------------------------------------------------------------------|--------------|
| KDM6A   | Frameshift/nonsense/splice-site                                                                                                                                                                                          | NM_021140    |
| KIT     | ins503, V559A, V559D, V559G, V559I, V560D, V560A, V560G, V560E, del560, E561K, del579, P627L, P627T, R634W, K642E, K642Q, V654A, V654E, H697Y, H697D, E761D, K807R, D816H, D816Y, D816F, D816I, D816V, D816H, del551-559 | NM_000222    |
| KMT2A   | Frameshift/nonsense/splice-site                                                                                                                                                                                          | NM_005933    |
| KRAS    | Missense at G12 / G13 / Q61 / A146                                                                                                                                                                                       | NM_033360    |
| MPL     | S505G, S505N, S505C, L510P, del513, W515A, W515R, W515K, W515S, W515L, A519T, A519V, Y591D, W515-518KT                                                                                                                   | NM_005373    |
| MYD88   | L265P                                                                                                                                                                                                                    | NM_002468    |
| NOTCH1  | Frameshift/nonsense/splice-site/missense in exon 26-34                                                                                                                                                                   | NM_017617    |
| NPM1    | Frameshift in exon 12                                                                                                                                                                                                    | NM_002520    |
| NRAS    | Missense at G12 / G13 / Q61                                                                                                                                                                                              | NM_002524    |
| PHF6    | Frameshift/nonsense/splice-site                                                                                                                                                                                          | NM_001015877 |
| PIGA    | Frameshift/nonsense/splice-site                                                                                                                                                                                          | NM_002641    |
| PPM1D   | Frameshift/nonsense/splice-site in exon 5/6                                                                                                                                                                              | NM_003620    |
| PRPF40B | Frameshift/nonsense/splice-site                                                                                                                                                                                          | NM_001031698 |
| PTEN    | Frameshift/nonsense/splice-site                                                                                                                                                                                          | NM_000314    |
| PTPN11  | Missense in aa range p.58-76 and p.491-510                                                                                                                                                                               | NM_002834    |
| RAD21   | Frameshift/nonsense/splice-site                                                                                                                                                                                          | NM_006265    |
| RUNX1   | Frameshift/nonsense/splice-site, S73F, H78Q, H78L, R80C, R80P, R80H, L85Q, P86L, P86H, S114L, D133Y, L134P, R135G, R135K, R135S, R139Q, R142S, A165V, R174Q, R177L, R177Q, A224T, D171G, D171V, D171N, R205W, R223C      | NM_001001890 |
| SETBP1  | D868N, D868T, S869N, G870S, I871T, D880N, D880Q                                                                                                                                                                          | NM_015559    |
| SF1     | Frameshift/nonsense/splice-site                                                                                                                                                                                          | NM_004630    |
| SF3A1   | Frameshift/nonsense/splice-site                                                                                                                                                                                          | NM_005877    |
| SF3B1   | Missense in terminal HEAT domains (p.529-1201)                                                                                                                                                                           | NM_012433    |
| SMC1A   | Missense at R96 / R586                                                                                                                                                                                                   | NM_006306    |
| SMC3    | Frameshift/nonsense/splice-site                                                                                                                                                                                          | NM_005445    |
| SRSF2   | Missense/deletion involving p.P95                                                                                                                                                                                        | NM_003016    |
| STAG2   | Frameshift/nonsense/splice-site                                                                                                                                                                                          | NM_006603    |

|       |                                                                                                    |              |
|-------|----------------------------------------------------------------------------------------------------|--------------|
| STAT3 | Missense in SH2 domain (p.580-670)                                                                 | NM_139276    |
| TET2  | Frameshift/nonsense/splice-site; Missense in conserved domains (p.1104-1481 and p.1843-2002)       | NM_001127208 |
| TP53  | Frameshift/nonsense/splice-site; Missense in DNA-binding domain (p.95-288); Missense at P72 / R337 | NM_001126112 |
| U2AF1 | Missense at S34 / R156 / Q157                                                                      | NM_006758    |
| U2AF2 | Missense in RNA recognition motifs domains (p.149-231, p.259-337, p.381-462)                       | NM_007279    |
| WT1   | Frameshift/nonsense/splice-site                                                                    | NM_024426    |
| ZRSR2 | Frameshift/nonsense/splice-site                                                                    | NM_005089    |

Supplemental Table S3 Driver CH mutations called

| ID   | Covid-19 status  | Gene  | Chr | Pos       | Ref    | Alt | Variant classification | Amino Acid Change | Total coverage | Alt | VAF     |
|------|------------------|-------|-----|-----------|--------|-----|------------------------|-------------------|----------------|-----|---------|
| H10  | hospitalized     | GNB1  | 1   | 1815790   | T      | C   | missense_variant       | p.K57E            | 1926           | 403 | 0.209   |
| H181 | hospitalized     | GNB1  | 1   | 1815790   | T      | C   | missense_variant       | p.K57E            | 1683           | 399 | 0.237   |
| N72  | non-hospitalized | GNB1  | 1   | 1815790   | T      | C   | missense_variant       | p.K57             | 1370           | 75  | 0.0539  |
| I203 | ICU              | NRAS  | 1   | 114716126 | C      | T   | missense_variant       | p.G12D            | 1878           | 22  | 0.0117  |
| I104 | ICU              | CBL   | 11  | 119278182 | A      | G   | missense_variant       | p.Y371C           | 1122           | 14  | 0.013   |
| H83  | hospitalized     | CBL   | 11  | 119278281 | G      | A   | missense_variant       | p.C404Y           | 1355           | 83  | 0.0613  |
| H138 | hospitalized     | CBL   | 11  | 119278281 | G      | A   | missense_variant       | p.C404Y           | 1313           | 18  | 0.0137  |
| H150 | hospitalized     | CBL   | 11  | 119278293 | G      | C   | missense_variant       | p.W408S           | 1479           | 45  | 0.0304  |
| I47  | ICU              | ETV6  | 12  | 11839289  | C      | T   | stop_gained            | p.R105*           | 1169           | 17  | 0.0145  |
| H63  | hospitalized     | KRAS  | 12  | 25245347  | C      | T   | missense_variant       | p.G13D            | 1341           | 28  | 0.0209  |
| I77  | ICU              | IDH2  | 15  | 90088702  | C      | T   | missense_variant       | p.R140Q           | 3944           | 159 | 0.0403  |
| H192 | hospitalized     | IDH2  | 15  | 90088702  | C      | T   | missense_variant       | p.R140Q           | 2203           | 881 | 0.4     |
| I158 | ICU              | TP53  | 17  | 7670680   | CT     | C   | frameshift_variant     | p.E343X           | 1705           | 19  | 0.0111  |
| H239 | hospitalized     | TP53  | 17  | 7673704   | G      | A   | stop_gained            | p.R306*           | 1669           | 19  | 0.0114  |
| N34  | non-hospitalized | TP53  | 17  | 7674221   | G      | A   | missense_variant       | p.R248            | 2434           | 25  | 0.01015 |
| H50  | hospitalized     | TP53  | 17  | 7674872   | T      | C   | missense_variant       | p.Y220C           | 1478           | 25  | 0.017   |
| N22  | non-hospitalized | TP53  | 17  | 7674872   | T      | C   | missense_variant       | Y220C             | 1942           | 21  | 0.0106  |
| H2   | hospitalized     | TP53  | 17  | 7674877   | CA     | C   | frameshift_variant     | p.V218X           | 1348           | 15  | 0.0111  |
| N109 | non-hospitalized | TP53  | 17  | 7674901   | G      | GT  | frameshift_variant     | TP53_p.N210       | 1465           | 30  | 0.017   |
| H34  | hospitalized     | TP53  | 17  | 7676053   | T      | C   | missense_variant       | p.S106G           | 2472           | 45  | 0.0182  |
| H218 | hospitalized     | STAT3 | 17  | 42322464  | T      | A   | missense_variant       | p.Y640F           | 1698           | 34  | 0.02    |
| I48  | ICU              | STAT3 | 17  | 42323052  | T      | G   | missense_variant       | p.S614R           | 2072           | 47  | 0.0227  |
| H156 | hospitalized     | PPM1D | 17  | 60663019  | AG     | A   | frameshift_variant     | p.R429X           | 1981           | 23  | 0.0116  |
| I26  | ICU              | PPM1D | 17  | 60663083  | T      | A   | stop_gained            | p.L450*           | 3522           | 72  | 0.018   |
| I103 | ICU              | PPM1D | 17  | 60663095  | CTGAGA | C   | frameshift_variant     | p.AEI454-456AX    | 1426           | 20  | 0.014   |
| I32  | ICU              | PPM1D | 17  | 60663164  | AT     | A   | frameshift_variant     | p.N477X           | 2446           | 30  | 0.012   |



|      |              |        |    |          |                            |     |                    |                   |      |     |          |
|------|--------------|--------|----|----------|----------------------------|-----|--------------------|-------------------|------|-----|----------|
| H71  | hospitalized | PPM1D  | 17 | 60663168 | C                          | A   | stop_gained        | p.C478*           | 1627 | 23  | 0.0141   |
| H104 | hospitalized | PPM1D  | 17 | 60663181 | AC                         | A   | frameshift_variant | p.T483X           | 3085 | 56  | 0.019    |
| H45  | hospitalized | PPM1D  | 17 | 60663184 | T                          | TTC | frameshift_variant | p.L484FX          | 2079 | 31  | 0.014    |
| I70  | ICU          | PPM1D  | 17 | 60663185 | T                          | A   | stop_gained        | p.L484*           | 2160 | 323 | 0.15     |
| H58  | hospitalized | PPM1D  | 17 | 60663262 | C                          | CA  | frameshift_variant | p.Q510QX          | 2170 | 32  | 0.009984 |
| I26  | ICU          | PPM1D  | 17 | 60663274 | A                          | T   | stop_gained        | p.K514*           | 2643 | 91  | 0.0344   |
| I66  | ICU          | PPM1D  | 17 | 60663292 | C                          | T   | stop_gained        | p.Q520*           | 2185 | 27  | 0.0124   |
| H195 | hospitalized | PPM1D  | 17 | 60663307 | GA                         | G   | frameshift_variant | p.E525X           | 1914 | 31  | 0.0162   |
| H113 | hospitalized | PPM1D  | 17 | 60663370 | CT                         | C   | frameshift_variant | p.L546X           | 1332 | 60  | 0.045    |
| H109 | hospitalized | PPM1D  | 17 | 60663388 | C                          | T   | stop_gained        | p.R552*           | 1386 | 19  | 0.0137   |
| H193 | hospitalized | PPM1D  | 17 | 60663388 | C                          | T   | stop_gained        | p.R552*           | 2020 | 392 | 0.194    |
| I26  | ICU          | PPM1D  | 17 | 60663448 | C                          | T   | stop_gained        | p.R572*           | 2944 | 45  | 0.0153   |
| I132 | ICU          | PPM1D  | 17 | 60663448 | C                          | T   | stop_gained        | p.R572*           | 1858 | 21  | 0.0113   |
| H86  | hospitalized | SRSF2  | 17 | 76736856 | CGGCTGTGGTGTG<br>AGTCCGGGG | C   | inframe_deletion   | p.PPDSHHSR95-102R | 4260 | 84  | 0.022    |
| I77  | ICU          | SRSF2  | 17 | 76736877 | G                          | A   | missense_variant   | p.P95L            | 4043 | 322 | 0.0796   |
| I161 | ICU          | SRSF2  | 17 | 76736877 | G                          | T   | missense_variant   | p.P95H            | 2065 | 210 | 0.102    |
| H114 | hospitalized | SRSF2  | 17 | 76736877 | G                          | A   | missense_variant   | p.P95L            | 900  | 58  | 0.0644   |
| H192 | hospitalized | SRSF2  | 17 | 76736877 | G                          | C   | missense_variant   | p.P95R            | 2180 | 871 | 0.4      |
| H221 | hospitalized | SRSF2  | 17 | 76736877 | G                          | T   | missense_variant   | p.P95H            | 1857 | 22  | 0.0118   |
| I97  | ICU          | JAK3   | 19 | 17837197 | G                          | A   | missense_variant   | p.A573V           | 847  | 12  | 0.0142   |
| H45  | hospitalized | DNMT3A | 2  | 25234304 | A                          | G   | missense_variant   | p.L905P           | 1228 | 18  | 0.0147   |
| I187 | ICU          | DNMT3A | 2  | 25234307 | G                          | A   | missense_variant   | p.P904L           | 2748 | 36  | 0.014    |
| H20  | hospitalized | DNMT3A | 2  | 25234307 | G                          | A   | missense_variant   | p.P904L           | 1589 | 112 | 0.0705   |
| H69  | hospitalized | DNMT3A | 2  | 25234307 | G                          | A   | missense_variant   | p.P904L           | 1140 | 29  | 0.0254   |
| H182 | hospitalized | DNMT3A | 2  | 25234307 | G                          | A   | missense_variant   | p.P904L           | 1319 | 33  | 0.025    |
| I154 | ICU          | DNMT3A | 2  | 25234316 | A                          | G   | missense_variant   | p.L901P           | 2081 | 24  | 0.01     |
| I40  | ICU          | DNMT3A | 2  | 25234323 | G                          | T   | missense_variant   | p.R899S           | 1407 | 49  | 0.0348   |
| I152 | ICU          | DNMT3A | 2  | 25234325 | A                          | G   | missense_variant   | p.I898T           | 1589 | 39  | 0.0245   |

|      |                  |        |   |          |             |   |                                         |                      |      |     |        |
|------|------------------|--------|---|----------|-------------|---|-----------------------------------------|----------------------|------|-----|--------|
| I138 | ICU              | DNMT3A | 2 | 25234373 | C           | A | missense_variant                        | p.R882L              | 1714 | 35  | 0.0204 |
| I157 | ICU              | DNMT3A | 2 | 25234373 | C           | T | missense_variant                        | p.R882H              | 1748 | 25  | 0.0143 |
| H58  | hospitalized     | DNMT3A | 2 | 25234373 | C           | T | missense_variant                        | p.R882H              | 1587 | 70  | 0.0441 |
| H81  | hospitalized     | DNMT3A | 2 | 25234373 | C           | T | missense_variant                        | p.R882H              | 1377 | 18  | 0.0131 |
| H229 | hospitalized     | DNMT3A | 2 | 25234373 | C           | T | missense_variant                        | p.R882H              | 1885 | 348 | 0.185  |
| N41  | non-hospitalized | DNMT3A | 2 | 25234373 | C           | T | missense_variant                        | p.R882               | 2899 | 34  | 0.011  |
| I4   | ICU              | DNMT3A | 2 | 25234374 | G           | A | missense_variant                        | p.R882C              | 1912 | 27  | 0.0141 |
| H19  | hospitalized     | DNMT3A | 2 | 25234374 | G           | A | missense_variant                        | p.R882C              | 1670 | 85  | 0.0509 |
| N6   | non-hospitalized | DNMT3A | 2 | 25234374 | G           | A | missense_variant                        | p.R882               | 2344 | 45  | 0.018  |
| I120 | ICU              | DNMT3A | 2 | 25235726 | A           | G | missense_variant                        | p.W860R              | 1815 | 33  | 0.021  |
| N6   | non-hospitalized | DNMT3A | 2 | 25235726 | A           | G | missense_variant                        | W860R                | 1836 | 199 | 0.108  |
| H106 | hospitalized     | DNMT3A | 2 | 25235755 | AC          | A | frameshift_variant                      | p.V850X              | 2734 | 591 | 0.176  |
| I128 | ICU              | DNMT3A | 2 | 25235775 | GC          | G | frameshift_variant                      | p.G843X              | 2342 | 90  | 0.035  |
| N9   | non-hospitalized | DNMT3A | 2 | 25235796 | CCTCGTAGTAA | C | frameshift_variant                      | DNMT3A_p.ITTR833-836 | 2169 | 68  | 0.032  |
| H106 | hospitalized     | DNMT3A | 2 | 25236967 | T           | C | missense_variant                        | p.Q816R              | 1691 | 25  | 0.0148 |
| I173 | ICU              | DNMT3A | 2 | 25239130 | C           | T | missense_variant, splice_region_variant | p.R803K              | 1276 | 234 | 0.183  |
| I118 | ICU              | DNMT3A | 2 | 25239148 | T           | C | missense_variant                        | p.N797S              | 1925 | 42  | 0.0218 |
| N13  | non-hospitalized | DNMT3A | 2 | 25239149 | T           | C | missense_variant                        | p.N797               | 2761 | 51  | 0.018  |
| I93  | ICU              | DNMT3A | 2 | 25239157 | A           | G | missense_variant                        | p.F794S              | 1312 | 24  | 0.018  |
| I144 | ICU              | DNMT3A | 2 | 25239199 | A           | G | missense_variant                        | p.I780T              | 2160 | 24  | 0.0111 |
| H103 | hospitalized     | DNMT3A | 2 | 25239199 | A           | G | missense_variant                        | p.I780T              | 2006 | 66  | 0.0329 |
| N6   | non-hospitalized | DNMT3A | 2 | 25239209 | G           | A | missense_variant                        | p.P777               | 2289 | 49  | 0.019  |
| I80  | ICU              | DNMT3A | 2 | 25240313 | G           | A | stop_gained                             | p.R771*              | 1666 | 18  | 0.0108 |
| I115 | ICU              | DNMT3A | 2 | 25240313 | G           | A | stop_gained                             | p.R771*              | 1582 | 154 | 0.0973 |
| I118 | ICU              | DNMT3A | 2 | 25240313 | G           | A | stop_gained                             | p.R771*              | 2236 | 41  | 0.018  |
| I190 | ICU              | DNMT3A | 2 | 25240313 | G           | A | stop_gained                             | p.R771*              | 2119 | 823 | 0.388  |
| I178 | ICU              | DNMT3A | 2 | 25240315 | G           | A | missense_variant                        | p.S770L              | 2295 | 32  | 0.014  |
| N60  | non-hospitalized | DNMT3A | 2 | 25240366 | CAGA        | C | inframe_deletion                        | DNMT3A_p.FW752-753   | 2385 | 28  | 0.012  |

Commented [GSV1]: Make this fit in a single line

|      |                  |        |   |          |                         |   |                                                 |               |      |     |         |
|------|------------------|--------|---|----------|-------------------------|---|-------------------------------------------------|---------------|------|-----|---------|
| N88  | non-hospitalized | DNMT3A | 2 | 25240367 | AG                      | A | frameshift_variant                              | DNMT3A_p.F752 | 1888 | 29  | 0.015   |
| H69  | hospitalized     | DNMT3A | 2 | 25240379 | G                       | C | missense_variant                                | p.R749G       | 1761 | 26  | 0.0148  |
| N54  | non-hospitalized | DNMT3A | 2 | 25240379 | G                       | C | missense_variant                                | p.R749        | 2629 | 50  | 0.018   |
| I189 | ICU              | DNMT3A | 2 | 25240417 | C                       | T | missense_variant                                | p.R736H       | 2341 | 34  | 0.0145  |
| I185 | ICU              | DNMT3A | 2 | 25240418 | G                       | A | missense_variant                                | p.R736C       | 1682 | 36  | 0.0214  |
| N6   | non-hospitalized | DNMT3A | 2 | 25240418 | G                       | A | missense_variant                                | p.R736        | 2623 | 109 | 0.0433  |
| I51  | ICU              | DNMT3A | 2 | 25240420 | T                       | C | missense_variant                                | p.Y735C       | 1760 | 28  | 0.0159  |
| I112 | ICU              | DNMT3A | 2 | 25240420 | T                       | C | missense_variant                                | p.Y735C       | 2058 | 137 | 0.0666  |
| N29  | non-hospitalized | DNMT3A | 2 | 25240420 | T                       | C | missense_variant                                | p.Y735        | 2534 | 77  | 0.0296  |
| N62  | non-hospitalized | DNMT3A | 2 | 25240423 | A                       | G | missense_variant                                | p.F734        | 3280 | 50  | 0.015   |
| I27  | ICU              | DNMT3A | 2 | 25240439 | G                       | A | missense_variant                                | p.R729W       | 748  | 33  | 0.0441  |
| H8   | hospitalized     | DNMT3A | 2 | 25240439 | G                       | A | missense_variant                                | p.R729W       | 1709 | 27  | 0.0158  |
| H216 | hospitalized     | DNMT3A | 2 | 25240439 | G                       | C | missense_variant                                | p.R729G       | 1383 | 16  | 0.0116  |
| N94  | non-hospitalized | DNMT3A | 2 | 25240439 | G                       | A | missense_variant                                | p.R729        | 2245 | 34  | 0.016   |
| H27  | hospitalized     | DNMT3A | 2 | 25240690 | C                       | A | missense_variant                                | p.S708I       | 2452 | 25  | 0.0102  |
| I102 | ICU              | DNMT3A | 2 | 25240697 | C                       | A | missense_variant                                | p.G706W       | 1080 | 43  | 0.0398  |
| I50  | ICU              | DNMT3A | 2 | 25240729 | A                       | T | missense_variant, splice_region_variant         | p.I695N       | 1469 | 26  | 0.0177  |
| I9   | ICU              | DNMT3A | 2 | 25241584 | ACGT                    | A | inframe_deletion                                | p.DV686-687V  | 2431 | 210 | 0.084   |
| I43  | ICU              | DNMT3A | 2 | 25241587 | T                       | A | missense_variant                                | p.D686V       | 1189 | 70  | 0.0589  |
| N7   | non-hospitalized | DNMT3A | 2 | 25241595 | G                       | T | stop_gained                                     | p.Y683        | 2832 | 35  | 0.012   |
| I156 | ICU              | DNMT3A | 2 | 25241645 | C                       | A | stop_gained                                     | p.E667*       | 2066 | 22  | 0.0106  |
| N88  | non-hospitalized | DNMT3A | 2 | 25241654 | C                       | G | missense_variant                                | p.E664        | 2824 | 39  | 0.013   |
| I60  | ICU              | DNMT3A | 2 | 25241666 | A                       | G | missense_variant                                | p.Y660H       | 1861 | 23  | 0.0124  |
| N39  | non-hospitalized | DNMT3A | 2 | 25241674 | A                       | C | missense_variant                                | p.V657        | 3215 | 78  | 0.02415 |
| I140 | ICU              | DNMT3A | 2 | 25241678 | G                       | A | stop_gained                                     | p.Q656*       | 2052 | 63  | 0.0307  |
| I112 | ICU              | DNMT3A | 2 | 25241698 | ACCAGGAGCC<br>CTGCACCAG | A | splice_acceptor_variant,coding_sequence_variant | p.-?_649      | 2395 | 28  | 0.013   |
| H106 | hospitalized     | DNMT3A | 2 | 25243900 | G                       | T | missense_variant,splice_region_variant          | p.T645K       | 2042 | 33  | 0.0162  |
| I175 | ICU              | DNMT3A | 2 | 25243901 | T                       | C | missense_variant                                | p.T645A       | 1743 | 71  | 0.0407  |

|      |                  |        |   |          |               |                            |                    |                   |      |     |         |
|------|------------------|--------|---|----------|---------------|----------------------------|--------------------|-------------------|------|-----|---------|
| H117 | hospitalized     | DNMT3A | 2 | 25243906 | A             | T                          | missense_variant   | p.I643N           | 1754 | 37  | 0.02    |
| I2   | ICU              | DNMT3A | 2 | 25243930 | C             | T                          | missense_variant   | p.R635Q           | 2554 | 27  | 0.0106  |
| H168 | hospitalized     | DNMT3A | 2 | 25243930 | C             | T                          | missense_variant   | p.R635Q           | 2179 | 61  | 0.028   |
| N5   | non-hospitalized | DNMT3A | 2 | 25243934 | T             | A                          | missense_variant   | p.I634            | 2823 | 57  | 0.0196  |
| I99  | ICU              | DNMT3A | 2 | 25244163 | G             | A                          | stop_gained        | p.Q615*           | 1351 | 27  | 0.016   |
| I128 | ICU              | DNMT3A | 2 | 25244163 | G             | A                          | stop_gained        | p.Q615*           | 1434 | 120 | 0.0837  |
| N17  | non-hospitalized | DNMT3A | 2 | 25244214 | G             | A                          | stop_gained        | p.R598            | 3147 | 48  | 0.01505 |
| N100 | non-hospitalized | DNMT3A | 2 | 25244214 | G             | A                          | stop_gained        | p.R598            | 1447 | 29  | 0.0195  |
| H26  | hospitalized     | DNMT3A | 2 | 25244240 | TTG           | T                          | frameshift_variant | p.HK588-589QX     | 2198 | 427 | 0.168   |
| I186 | ICU              | DNMT3A | 2 | 25244248 | G             | C                          | missense_variant   | p.C586W           | 1941 | 103 | 0.0531  |
| H107 | hospitalized     | DNMT3A | 2 | 25244250 | A             | AC                         | frameshift_variant | p.-585-586X       | 1967 | 117 | 0.059   |
| H206 | hospitalized     | DNMT3A | 2 | 25244265 | AG            | TA                         | missense_variant   | p.PW580-581PR     | 3322 | 39  | 0.013   |
| N29  | non-hospitalized | DNMT3A | 2 | 25244265 | AG            | A                          | frameshift_variant | DNMT3A_p.P580     | 2636 | 34  | 0.012   |
| H133 | hospitalized     | DNMT3A | 2 | 25244285 | GCCTGGGCAGCCC | G                          | inframe_deletion   | p.GAAQA570-574A   | 2500 | 46  | 0.019   |
| H103 | hospitalized     | DNMT3A | 2 | 25244559 | C             | T                          | missense_variant   | p.G550R           | 3232 | 38  | 0.012   |
| I167 | ICU              | DNMT3A | 2 | 25244568 | G             | A                          | missense_variant   | p.L547F           | 1645 | 52  | 0.0316  |
| N82  | non-hospitalized | DNMT3A | 2 | 25244616 | C             | T                          | missense_variant   | p.D531            | 3585 | 128 | 0.0343  |
| H84  | hospitalized     | DNMT3A | 2 | 25244622 | C             | T                          | missense_variant   | p.D529N           | 1812 | 59  | 0.0326  |
| H176 | hospitalized     | DNMT3A | 2 | 25244625 | A             | ACTGGTAGCCGTC<br>GTCGTCGTT | inframe_insertion  | p.-527-528NDDGGYQ | 2387 | 93  | 0.042   |
| H167 | hospitalized     | DNMT3A | 2 | 25244628 | G             | A                          | stop_gained        | p.Q527*           | 2428 | 50  | 0.0206  |
| N104 | non-hospitalized | DNMT3A | 2 | 25244643 | GA            | G                          | frameshift_variant | DNMT3A_p.F521     | 2042 | 42  | 0.019   |
| H218 | hospitalized     | DNMT3A | 2 | 25245256 | G             | C                          | missense_variant   | p.C517W           | 2353 | 28  | 0.012   |
| H186 | hospitalized     | DNMT3A | 2 | 25245284 | AG            | A                          | frameshift_variant | p.L508X           | 3012 | 41  | 0.011   |
| N27  | non-hospitalized | DNMT3A | 2 | 25246184 | C             | A                          | stop_gained        | p.E469            | 2701 | 126 | 0.04635 |
| H197 | hospitalized     | DNMT3A | 2 | 25246208 | TG            | T                          | frameshift_variant | p.S460X           | 2679 | 49  | 0.018   |
| H79  | hospitalized     | DNMT3A | 2 | 25246214 | TC            | T                          | frameshift_variant | p.R458X           | 2442 | 63  | 0.026   |
| I42  | ICU              | DNMT3A | 2 | 25246660 | GC            | G                          | frameshift_variant | p.G413X           | 2547 | 48  | 0.011   |
| N91  | non-hospitalized | DNMT3A | 2 | 25247070 | G             | A                          | missense_variant   | p.A368            | 2648 | 61  | 0.023   |

|      |                  |        |   |           |         |   |                                                 |               |      |     |         |
|------|------------------|--------|---|-----------|---------|---|-------------------------------------------------|---------------|------|-----|---------|
| I176 | ICU              | DNMT3A | 2 | 25247080  | A       | G | missense_variant                                | p.Y365H       | 1673 | 45  | 0.0269  |
| I15  | ICU              | DNMT3A | 2 | 25247089  | G       | A | stop_gained                                     | p.Q362*       | 2065 | 27  | 0.0131  |
| N69  | non-hospitalized | DNMT3A | 2 | 25247105  | CT      | C | frameshift_variant                              | DNMT3A_p.Q356 | 2945 | 88  | 0.028   |
| H48  | hospitalized     | DNMT3A | 2 | 25247615  | C       | T | stop_gained                                     | p.W330*       | 1100 | 31  | 0.028   |
| H176 | hospitalized     | DNMT3A | 2 | 25247624  | C       | T | stop_gained                                     | p.W327*       | 2486 | 56  | 0.021   |
| I176 | ICU              | DNMT3A | 2 | 25247628  | C       | T | missense_variant                                | p.R326H       | 1633 | 45  | 0.0276  |
| I170 | ICU              | DNMT3A | 2 | 25247646  | CG      | C | frameshift_variant                              | p.R320X       | 1259 | 16  | 0.0127  |
| I51  | ICU              | DNMT3A | 2 | 25247647  | G       | A | stop_gained                                     | p.R320*       | 1478 | 385 | 0.26    |
| I195 | ICU              | DNMT3A | 2 | 25247647  | G       | A | stop_gained                                     | p.R320*       | 1836 | 139 | 0.0757  |
| H18  | hospitalized     | DNMT3A | 2 | 25247659  | TC      | T | frameshift_variant                              | p.M315X       | 3387 | 55  | 0.016   |
| I140 | ICU              | DNMT3A | 2 | 25247666  | C       | T | stop_gained                                     | p.W313*       | 2445 | 61  | 0.0249  |
| I172 | ICU              | DNMT3A | 2 | 25247666  | C       | T | stop_gained                                     | p.W313*       | 2035 | 73  | 0.0359  |
| H66  | hospitalized     | DNMT3A | 2 | 25247676  | A       | G | missense_variant                                | p.I310T       | 1620 | 459 | 0.283   |
| I182 | ICU              | DNMT3A | 2 | 25247677  | T       | G | missense_variant                                | p.I310L       | 1941 | 38  | 0.0196  |
| H235 | hospitalized     | DNMT3A | 2 | 25247691  | C       | T | stop_gained                                     | p.W305*       | 2145 | 24  | 0.0112  |
| H63  | hospitalized     | DNMT3A | 2 | 25247742  | CGG     | C | frameshift_variant                              | p.GR287-288GX | 2126 | 38  | 0.018   |
| H63  | hospitalized     | DNMT3A | 2 | 25247745  | CCGTCCT | C | splice_acceptor_variant,coding_sequence_variant | p.-?287       | 2150 | 38  | 0.017   |
| I122 | ICU              | DNMT3A | 2 | 25248115  | AGC     | A | frameshift_variant                              | p.A259X       | 2267 | 45  | 0.02    |
| H130 | hospitalized     | SF3B1  | 2 | 197402110 | T       | C | missense_variant                                | p.K700E       | 1465 | 17  | 0.0116  |
| H179 | hospitalized     | SF3B1  | 2 | 197402110 | T       | C | missense_variant                                | p.K700E       | 1374 | 77  | 0.056   |
| N29  | non-hospitalized | SF3B1  | 2 | 197402110 | T       | C | missense_variant                                | p.K700        | 1269 | 37  | 0.0289  |
| H16  | hospitalized     | SF3B1  | 2 | 197402635 | C       | A | missense_variant                                | p.K666N       | 1549 | 182 | 0.117   |
| I139 | ICU              | SF3B1  | 2 | 197402636 | T       | C | missense_variant                                | p.K666R       | 1600 | 20  | 0.0125  |
| I10  | ICU              | SF3B1  | 2 | 197402637 | T       | C | missense_variant                                | p.K666E       | 1792 | 22  | 0.0123  |
| I10  | ICU              | SF3B1  | 2 | 197402645 | G       | A | missense_variant                                | p.T663I       | 1842 | 64  | 0.0347  |
| I97  | ICU              | SF3B1  | 2 | 197402654 | G       | A | missense_variant                                | p.A660V       | 562  | 10  | 0.0178  |
| I10  | ICU              | SF3B1  | 2 | 197402655 | C       | A | missense_variant                                | p.A660S       | 1947 | 30  | 0.0154  |
| N109 | non-hospitalized | SF3B1  | 2 | 197402756 | T       | A | missense_variant                                | p.N626        | 1163 | 52  | 0.04465 |

|      |                  |       |    |           |                             |          |                    |                        |      |     |        |
|------|------------------|-------|----|-----------|-----------------------------|----------|--------------------|------------------------|------|-----|--------|
| I10  | ICU              | SF3B1 | 2  | 197402759 | C                           | A        | missense_variant   | p.R625L                | 1929 | 23  | 0.0119 |
| H214 | hospitalized     | SF3B1 | 2  | 197402760 | G                           | A        | missense_variant   | p.R625C                | 1476 | 483 | 0.327  |
| N109 | non-hospitalized | SF3B1 | 2  | 197402765 | T                           | C        | missense_variant   | p.Y623                 | 1087 | 24  | 0.0218 |
| I41  | ICU              | ASXL1 | 20 | 32433732  | C                           | T        | stop_gained        | p.Q512*                | 2051 | 278 | 0.136  |
| I150 | ICU              | ASXL1 | 20 | 32433732  | C                           | T        | stop_gained        | p.Q512*                | 2075 | 79  | 0.0381 |
| H183 | hospitalized     | ASXL1 | 20 | 32433780  | G                           | T        | stop_gained        | p.E528*                | 3179 | 158 | 0.0497 |
| I97  | ICU              | ASXL1 | 20 | 32433807  | G                           | A        | missense_variant   | p.E537K                | 707  | 12  | 0.017  |
| I97  | ICU              | ASXL1 | 20 | 32434599  | TCACCACTGCCATAGA<br>GAGCGGC | T        | frameshift_variant | p.HHCHREAA630-<br>637X | 1288 | 168 | 0.133  |
| I118 | ICU              | ASXL1 | 20 | 32434745  | G                           | GGGGAGGC | frameshift_variant | p.R678RGGX             | 2980 | 46  | 0.016  |
| H18  | hospitalized     | ASXL1 | 20 | 32434769  | AGT                         | A        | frameshift_variant | p.KC686-687KX          | 2538 | 376 | 0.135  |
| H178 | hospitalized     | ASXL1 | 20 | 32434841  | GA                          | G        | frameshift_variant | p.G710X                | 2788 | 69  | 0.026  |
| H237 | hospitalized     | ASXL1 | 20 | 32434886  | GA                          | G        | frameshift_variant | p.R725X                | 3120 | 91  | 0.031  |
| I31  | ICU              | ASXL1 | 20 | 32434940  | TA                          | T        | frameshift_variant | p.L743X                | 1590 | 148 | 0.086  |
| H83  | hospitalized     | ASXL1 | 20 | 32434989  | C                           | A        | stop_gained        | p.C759*                | 2012 | 540 | 0.268  |
| H126 | hospitalized     | ASXL1 | 20 | 32435380  | C                           | CT       | frameshift_variant | p.L890LX               | 1118 | 87  | 0.071  |
| I24  | ICU              | ASXL1 | 20 | 32435387  | CTAACAGTCT                  | C        | frameshift_variant | p.SNSS892-895X         | 2292 | 26  | 0.012  |
| I139 | ICU              | GNAS  | 20 | 58909366  | G                           | A        | missense_variant   | p.R201H                | 1690 | 20  | 0.0118 |
| H227 | hospitalized     | GNAS  | 20 | 58909366  | G                           | A        | missense_variant   | p.R201H                | 1797 | 81  | 0.0451 |
| H126 | hospitalized     | TET2  | 4  | 105234229 | GCA                         | G        | frameshift_variant | p.RT96-97RX            | 1046 | 143 | 0.125  |
| H235 | hospitalized     | TET2  | 4  | 105234336 | AATCCAGGT<br>GAAAGCAG       | A        | frameshift_variant | p.NPGE5S132-137X       | 3095 | 39  | 0.013  |
| N27  | non-hospitalized | TET2  | 4  | 105234591 | TC                          | T        | frameshift_variant | TET2_p.S217            | 2451 | 80  | 0.029  |
| N54  | non-hospitalized | TET2  | 4  | 105234659 | CA                          | C        | frameshift_variant | TET2_p.I240            | 2384 | 32  | 0.013  |
| H131 | hospitalized     | TET2  | 4  | 105234763 | TC                          | T        | frameshift_variant | p.I274X                | 1928 | 24  | 0.0124 |
| H161 | hospitalized     | TET2  | 4  | 105234763 | TC                          | T        | frameshift_variant | p.I274X                | 2622 | 184 | 0.062  |
| N45  | non-hospitalized | TET2  | 4  | 105234915 | C                           | T        | stop_gained        | p.Q325                 | 1947 | 43  | 0.0219 |
| N24  | non-hospitalized | TET2  | 4  | 105235097 | A                           | AGT      | frameshift_variant | TET2_p.-385-386        | 2200 | 78  | 0.034  |
| H150 | hospitalized     | TET2  | 4  | 105235147 | C                           | G        | stop_gained        | p.S402*                | 2505 | 27  | 0.0108 |
| N2   | non-hospitalized | TET2  | 4  | 105235172 | TC                          | T        | frameshift_variant | TET2_p.P411            | 1793 | 642 | 0.26   |

|      |                  |      |   |           |                             |    |                                        |                     |      |     |        |
|------|------------------|------|---|-----------|-----------------------------|----|----------------------------------------|---------------------|------|-----|--------|
| I11  | ICU              | TET2 | 4 | 105235178 | TC                          | T  | frameshift_variant                     | p.P413X             | 3722 | 191 | 0.048  |
| N74  | non-hospitalized | TET2 | 4 | 105235178 | TC                          | T  | frameshift_variant                     | TET2_p.P413         | 2414 | 98  | 0.039  |
| I147 | ICU              | TET2 | 4 | 105235203 | GA                          | G  | frameshift_variant                     | p.E421X             | 2536 | 573 | 0.19   |
| H99  | hospitalized     | TET2 | 4 | 105235203 | GA                          | G  | frameshift_variant                     | p.E421X             | 2477 | 76  | 0.0307 |
| H150 | hospitalized     | TET2 | 4 | 105235275 | C                           | CT | frameshift_variant                     | p.L445LX            | 3107 | 133 | 0.038  |
| H63  | hospitalized     | TET2 | 4 | 105235547 | C                           | CA | frameshift_variant                     | p.-535-536X         | 2016 | 478 | 0.192  |
| I121 | ICU              | TET2 | 4 | 105235662 | C                           | T  | stop_gained                            | p.Q574*             | 2179 | 254 | 0.117  |
| H173 | hospitalized     | TET2 | 4 | 105235778 | TG                          | T  | frameshift_variant                     | p.G613X             | 1780 | 57  | 0.032  |
| H96  | hospitalized     | TET2 | 4 | 105235966 | C                           | G  | stop_gained                            | p.S675*             | 2443 | 32  | 0.0131 |
| I6   | ICU              | TET2 | 4 | 105236172 | C                           | T  | stop_gained                            | p.Q744*             | 1895 | 321 | 0.169  |
| I42  | ICU              | TET2 | 4 | 105236172 | C                           | T  | stop_gained                            | p.Q744*             | 2484 | 33  | 0.014  |
| I97  | ICU              | TET2 | 4 | 105236315 | T                           | A  | stop_gained                            | p.Y791*             | 1414 | 129 | 0.0912 |
| I147 | ICU              | TET2 | 4 | 105236559 | A                           | AT | frameshift_variant                     | p.I873IX            | 2330 | 288 | 0.107  |
| N74  | non-hospitalized | TET2 | 4 | 105236563 | CA                          | C  | frameshift_variant                     | TET2_p.P874         | 2002 | 49  | 0.021  |
| H84  | hospitalized     | TET2 | 4 | 105236781 | C                           | T  | stop_gained                            | p.Q947*             | 2156 | 62  | 0.0288 |
| N109 | non-hospitalized | TET2 | 4 | 105237058 | C                           | A  | stop_gained                            | p.S1039             | 1200 | 83  | 0.0701 |
| I123 | ICU              | TET2 | 4 | 105237084 | CTCAAAATCACAG<br>AAGCAAAGTA | C  | frameshift_variant                     | p.LKSQKQV1048-1054X | 3577 | 56  | 0.017  |
| I8   | ICU              | TET2 | 4 | 105237091 | C                           | A  | stop_gained                            | p.S1050*            | 1192 | 954 | 0.445  |
| I50  | ICU              | TET2 | 4 | 105237163 | TTGATAGCCACA                | T  | frameshift_variant                     | p.LDSHT1074-1078LX  | 2681 | 51  | 0.019  |
| I172 | ICU              | TET2 | 4 | 105241425 | G                           | T  | stop_gained                            | p.E1166*            | 1408 | 70  | 0.0497 |
| H113 | hospitalized     | TET2 | 4 | 105241429 | G                           | A  | missense_variant,splice_region_variant | p.R1167K            | 698  | 23  | 0.033  |
| I179 | ICU              | TET2 | 4 | 105242863 | T                           | G  | missense_variant                       | p.I1177S            | 1922 | 34  | 0.0177 |
| I66  | ICU              | TET2 | 4 | 105242882 | TG                          | T  | frameshift_variant                     | p.G1184X            | 2677 | 38  | 0.015  |
| I157 | ICU              | TET2 | 4 | 105242904 | C                           | T  | stop_gained                            | p.Q1191*            | 1681 | 354 | 0.211  |
| H6   | hospitalized     | TET2 | 4 | 105243633 | AC                          | A  | frameshift_variant                     | p.T1220X            | 3146 | 45  | 0.013  |
| H4   | hospitalized     | TET2 | 4 | 105243714 | GA                          | G  | frameshift_variant                     | p.E1247X            | 1804 | 148 | 0.082  |
| N6   | non-hospitalized | TET2 | 4 | 105243760 | G                           | A  | missense_variant                       | p.R1262             | 1627 | 23  | 0.0134 |
| N90  | non-hospitalized | TET2 | 4 | 105243763 | G                           | A  | missense_variant                       | p.C1263             | 1458 | 125 | 0.0872 |

|      |                  |      |   |           |                     |     |                    |                   |      |     |        |
|------|------------------|------|---|-----------|---------------------|-----|--------------------|-------------------|------|-----|--------|
| I29  | ICU              | TET2 | 4 | 105259636 | A                   | AG  | frameshift_variant | p.Q1274QX         | 1317 | 22  | 0.016  |
| I147 | ICU              | TET2 | 4 | 105259665 | T                   | G   | missense_variant   | p.S1284A          | 1963 | 64  | 0.0326 |
| I147 | ICU              | TET2 | 4 | 105259669 | T                   | C   | missense_variant   | p.F1285S          | 1981 | 72  | 0.0363 |
| H29  | hospitalized     | TET2 | 4 | 105259683 | T                   | TC  | frameshift_variant | p.S1290SX         | 3031 | 64  | 0.021  |
| H128 | hospitalized     | TET2 | 4 | 105261761 | AG                  | A   | frameshift_variant | p.E1320X          | 1042 | 23  | 0.0221 |
| H215 | hospitalized     | TET2 | 4 | 105269684 | A                   | AT  | frameshift_variant | p.-1373-1374X     | 2793 | 124 | 0.043  |
| H176 | hospitalized     | TET2 | 4 | 105272591 | C                   | T   | stop_gained        | p.R1404*          | 2024 | 39  | 0.019  |
| H99  | hospitalized     | TET2 | 4 | 105272741 | GT                  | G   | frameshift_variant | p.V1454X          | 3130 | 123 | 0.038  |
| I77  | ICU              | TET2 | 4 | 105272742 | T                   | A   | missense_variant   | p.V1454D          | 3967 | 53  | 0.0134 |
| I97  | ICU              | TET2 | 4 | 105272775 | G                   | A   | missense_variant   | p.R1465Q          | 772  | 9   | 0.0117 |
| H66  | hospitalized     | TET2 | 4 | 105272838 | CAAAT               | C   | frameshift_variant | p.SN1486-1487X    | 2062 | 169 | 0.078  |
| I135 | ICU              | TET2 | 4 | 105272871 | C                   | G   | stop_gained        | p.S1497*          | 1952 | 22  | 0.0113 |
| I23  | ICU              | TET2 | 4 | 105275080 | C                   | T   | stop_gained        | p.Q1524*          | 1695 | 200 | 0.118  |
| N84  | non-hospitalized | TET2 | 4 | 105275110 | C                   | CA  | frameshift_variant | TET2_p.Q1534      | 1328 | 20  | 0.013  |
| I120 | ICU              | TET2 | 4 | 105275190 | T                   | A   | stop_gained        | p.Y1560*          | 1724 | 430 | 0.249  |
| I64  | ICU              | TET2 | 4 | 105275338 | AATTCCTCTA<br>ATCCC | A   | frameshift_variant | p.NSSNP1610-1614X | 2812 | 254 | 0.088  |
| N66  | non-hospitalized | TET2 | 4 | 105275614 | C                   | T   | stop_gained        | p.Q1702           | 2923 | 823 | 0.2825 |
| H34  | hospitalized     | TET2 | 4 | 105275992 | C                   | T   | stop_gained        | p.Q1828*          | 2415 | 31  | 0.0128 |
| H113 | hospitalized     | TET2 | 4 | 105276029 | C                   | CAG | frameshift_variant | p.A1840AX         | 1454 | 62  | 0.039  |
| H211 | hospitalized     | TET2 | 4 | 105276088 | G                   | A   | missense_variant   | p.G1860R          | 1971 | 105 | 0.0533 |
| I105 | ICU              | TET2 | 4 | 105276092 | G                   | A   | missense_variant   | p.G1861E          | 1097 | 30  | 0.0273 |
| I134 | ICU              | TET2 | 4 | 105276092 | G                   | T   | missense_variant   | p.G1861V          | 2217 | 34  | 0.0153 |
| H140 | hospitalized     | TET2 | 4 | 105276092 | G                   | A   | missense_variant   | p.G1861E          | 2476 | 79  | 0.0319 |
| N73  | non-hospitalized | TET2 | 4 | 105276092 | G                   | A   | missense_variant   | p.G1861           | 3176 | 50  | 0.014  |
| H66  | hospitalized     | TET2 | 4 | 105276113 | AT                  | A   | frameshift_variant | p.H1868X          | 2187 | 30  | 0.012  |
| H173 | hospitalized     | TET2 | 4 | 105276114 | TG                  | T   | frameshift_variant | p.G1869X          | 3014 | 229 | 0.096  |
| H214 | hospitalized     | TET2 | 4 | 105276128 | T                   | C   | missense_variant   | p.I1873T          | 1752 | 39  | 0.0223 |
| I126 | ICU              | TET2 | 4 | 105276151 | C                   | T   | missense_variant   | p.H1881Y          | 2041 | 32  | 0.0157 |



|      |                  |       |   |           |         |    |                    |                    |      |     |        |
|------|------------------|-------|---|-----------|---------|----|--------------------|--------------------|------|-----|--------|
| I140 | ICU              | TET2  | 4 | 105276160 | A       | G  | missense_variant   | p.T1884A           | 2228 | 47  | 0.0211 |
| N59  | non-hospitalized | TET2  | 4 | 105276177 | CAATAGG | C  | inframe_deletion   | TET2_p.NR1890-1891 | 2678 | 269 | 0.089  |
| H6   | hospitalized     | TET2  | 4 | 105276248 | G       | A  | missense_variant   | p.G1913D           | 2334 | 34  | 0.0146 |
| N83  | non-hospitalized | TET2  | 4 | 105276391 | G       | GA | frameshift_variant | TET2_p.E1961       | 2390 | 35  | 0.014  |
| H229 | hospitalized     | TET2  | 4 | 105276395 | C       | T  | missense_variant   | p.P1962L           | 2409 | 586 | 0.243  |
| I147 | ICU              | RAD21 | 8 | 116854454 | CT      | C  | frameshift_variant | p.K317X            | 1754 | 358 | 0.171  |
| H140 | hospitalized     | RAD21 | 8 | 116866697 | TC      | T  | frameshift_variant | p.R11X             | 2339 | 24  | 0.012  |
| H11  | hospitalized     | JAK2  | 9 | 5073770   | G       | T  | missense_variant   | p.V617F            | 1217 | 17  | 0.014  |
| H126 | hospitalized     | JAK2  | 9 | 5073770   | G       | T  | missense_variant   | p.V617F            | 494  | 104 | 0.211  |
| H128 | hospitalized     | JAK2  | 9 | 5073770   | G       | T  | missense_variant   | p.V617F            | 829  | 75  | 0.0905 |
| N19  | non-hospitalized | JAK2  | 9 | 5073770   | G       | T  | missense_variant   | p.V617             | 1359 | 110 | 0.072  |
| N70  | non-hospitalized | JAK2  | 9 | 5073770   | G       | T  | missense_variant   | p.V617             | 1489 | 146 | 0.086  |
| H115 | hospitalized     | BCOR  | X | 40052205  | T       | TA | frameshift_variant | p.L1724FX          | 885  | 21  | 0.025  |
| H115 | hospitalized     | BCOR  | X | 40053925  | A       | AG | frameshift_variant | p.L1646FX          | 755  | 214 | 0.214  |
| N1   | non-hospitalized | SMC1A | X | 53405077  | G       | A  | missense_variant   | p.R711             | 1823 | 21  | 0.012  |
| I34  | ICU              | BRCC3 | X | 155077239 | C       | T  | stop_gained        | p.R89*             | 754  | 20  | 0.0265 |

Supplemental Table S4 Proportional odds model results for Covid-19 covariates with the 3 different hospitalization status as outcome

| Multivariable Proportional Odds Model for Hospitalization Outcome |        |       |       |         |          |        |
|-------------------------------------------------------------------|--------|-------|-------|---------|----------|--------|
| Variable                                                          | Coef   | SE    | OR    | 2.5% CI | 97.5% CI | P-val  |
| Age                                                               | -0.005 | 0.010 | 0.995 | 0.975   | 1.015    | 0.617  |
| Sex                                                               |        |       |       |         |          |        |
| Male                                                              | 1.042  | 0.203 | 2.836 | 1.910   | 4.240    | 0***   |
| Female                                                            | --     | --    | --    | --      | --       | --     |
| Ethnicity                                                         |        |       |       |         |          |        |
| White                                                             | --     | --    | --    | --      | --       | --     |
| Non-white                                                         | 0.483  | 0.290 | 1.622 | 0.922   | 2.881    | 0.095  |
| Diabetes                                                          |        |       |       |         |          |        |
| Yes                                                               | 0.447  | 0.226 | 1.563 | 1.006   | 2.442    | 0.048* |
| No                                                                | --     | --    | --    | --      | --       | --     |
| COPD/Asthma                                                       |        |       |       |         |          |        |
| Yes                                                               | -0.261 | 0.271 | 0.770 | 0.452   | 1.310    | 0.334  |
| No                                                                | --     | --    | --    | --      | --       | --     |
| CV                                                                |        |       |       |         |          |        |
| Yes                                                               | 0.491  | 0.247 | 1.634 | 1.009   | 2.662    | 0.047* |
| No                                                                | --     | --    | --    | --      | --       | --     |
| Cancer/neoplasms/hem dz                                           |        |       |       |         |          |        |
| Yes                                                               | -0.296 | 0.376 | 0.744 | 0.355   | 1.561    | 0.431  |
| No                                                                | --     | --    | --    | --      | --       | --     |
| Immunodeficiency                                                  |        |       |       |         |          |        |
| Yes                                                               | 0.744  | 0.330 | 2.105 | 1.111   | 4.067    | 0.024* |
| No                                                                | --     | --    | --    | --      | --       | --     |
| Smoking                                                           |        |       |       |         |          |        |
| Ever-smoker                                                       | -0.068 | 0.173 | 0.934 | 0.666   | 1.312    | 0.694  |
| Never-smoker                                                      | --     | --    | --    | --      | --       | --     |

Coef = coefficient; SE = standard error; OR = odds ratio; CI = confidence interval

\*  $p$  value < 0.05, \*\*\*  $p$  value < 0.001

Supplemental Table S5 Blood count information at admission

|                                 |                    | Data available subjects | Data missing subjects | Min  | 2.5% CI | Median | Mean  | Std   | 97.5% CI | Max   |
|---------------------------------|--------------------|-------------------------|-----------------------|------|---------|--------|-------|-------|----------|-------|
| Hgb [g/L]                       | Hospitalized + ICU | 419                     | 29                    | 10.6 | 115.7   | 120.0  | 118.3 | 27.5  | 120.9    | 173.0 |
|                                 | non-cancer         | 388                     | 26                    | 10.6 | 117.2   | 121.5  | 120.0 | 27.5  | 122.7    | 173.0 |
|                                 | cancer             | 31                      | 3                     | 78.0 | 107.7   | 112.0  | 113.7 | 19.4  | 121.3    | 157.0 |
| WBC [10 <sup>9</sup> /L]        | Hospitalized + ICU | 419                     | 29                    | 1.6  | 8.4     | 7.9    | 8.8   | 4.5   | 9.2      | 30.7  |
|                                 | non-cancer         | 388                     | 26                    | 1.8  | 8.5     | 8.0    | 9.0   | 4.5   | 9.4      | 30.7  |
|                                 | cancer             | 31                      | 3                     | 1.6  | 5.3     | 6.4    | 6.7   | 4.0   | 8.2      | 18.6  |
| Lymphocyte [10 <sup>9</sup> /L] | Hospitalized + ICU | 410                     | 38                    | 0.1  | 1.0     | 1.0    | 1.1   | 0.7   | 1.2      | 7.7   |
|                                 | non-cancer         | 379                     | 35                    | 0.1  | 1.1     | 1.0    | 1.1   | 0.7   | 1.2      | 7.7   |
|                                 | cancer             | 31                      | 3                     | 0.2  | 0.7     | 0.9    | 0.9   | 0.5   | 1.1      | 2.2   |
| Neutrophil [10 <sup>9</sup> /L] | Hospitalized + ICU | 409                     | 39                    | 0.8  | 6.6     | 6.1    | 7.0   | 4.1   | 7.4      | 26.8  |
|                                 | non-cancer         | 379                     | 35                    | 1.0  | 6.7     | 6.3    | 7.1   | 4.1   | 7.6      | 26.8  |
|                                 | cancer             | 30                      | 4                     | 0.8  | 4.0     | 4.7    | 5.2   | 3.4   | 6.4      | 15.5  |
| Platelets [10 <sup>9</sup> /L]  | Hospitalized + ICU | 414                     | 34                    | 26.0 | 267.1   | 253.5  | 280.5 | 139.1 | 293.9    | 878.0 |
|                                 | non-cancer         | 384                     | 30                    | 26.0 | 272.2   | 257.5  | 286.0 | 137.6 | 299.7    | 878.0 |
|                                 | cancer             | 30                      | 4                     | 32.0 | 160.0   | 196.0  | 210.1 | 141.4 | 260.7    | 583.0 |

## REFERENCES

1. Jaiswal S, Fontanillas P, Flannick J, et al. Age-Related Clonal Hematopoiesis Associated with Adverse Outcomes. *N Engl J Med.* 2014;371(26):2488-2498.
2. Jaiswal S, Natarajan P, Silver AJ, et al. Clonal Hematopoiesis and Risk of Atherosclerotic Cardiovascular Disease. *N Engl J Med.* 2017;377(2):111-121.
3. Genovese G, Kähler AK, Handsaker RE, et al. Clonal hematopoiesis and blood-cancer risk inferred from blood DNA sequence. *N Engl J Med.* 2014;371:2477–2487.

4. Li H, Durbin R. Fast and accurate short read alignment with Burrows–Wheeler transform. *Bioinformatics*. 2009;25(14):1754-1760.
5. Li H, Handsaker B, Wysoker A, et al. The Sequence Alignment/Map format and SAMtools. *Bioinformatics*. 2009;25(16):2078-2079.
6. Gerstung M, Beisel C, Rechsteiner M, et al. Reliable detection of subclonal single-nucleotide variants in tumour cell populations. *Nat Commun*. 2012;3:811.
7. Gerstung M, Papaemmanuil E, Campbell PJ. Subclonal variant calling with multiple samples and prior knowledge. *Bioinformatics*. 2014;30(9):1198-1204.
8. Cibulskis K, Lawrence MS, Carter SL, et al. Sensitive detection of somatic point mutations in impure and heterogeneous cancer samples. *Nat Biotechnol*. 2013;31(3):213-219.

## Appendix A: The ISARIC4C Investigators

Kayode Adeniji; Daniel Agranoff; Ken Agwuh; Katie A. Ahmed; Dhiraj Ail; Erin L. Aldera; Ana Alegria; Beatrice Alex; Sam Allen; Petros Andrikopoulos, PhD; Brian Angus; Jane A Armstrong; Abdul Ashish; Milton Ashworth; Innocent G Asiimwe; Dougal Atkinson; Benjamin Bach, PhD; Siddharth Bakshi; Wendy S Barclay; Shahedal Bari; Samantha L Barlow; Gavin Barlow; Stella Barnass; Nicholas Barrett; Christopher Bassford; Sneha Basude; David Baxter; Michael Beadsworth; Jolanta Bernatoniene; John Berridge; Colin Berry; Nicola Best; Debby Bogaert; Laura Booth; Pieter Bothma; Benjamin Brennan; Robin Brittain-Long; Katie Bullock; Naomi Bulteel; Tom Burden; Andrew Burtenshaw; Nicola Carlucci; Gail Carson, MBChB; Vikki Caruth; Emily Cass; Benjamin WA Catterall; David Chadwick; David Chadwick; Duncan Chambler; Meera Chand; Kanta Chechi, PhD; Nigel Chee; Jenny Child; Srikanth Chukkambotla; Jordan J Clark; Richard Clark; Tom Clark; Emily A Clarke; Sara Clohisey; Sarah Cole; Paul Collini; Marie Connor; Graham S Cooke; Louise Cooper; Catherine Cosgrove; Audrey Coutts; Helen Cox; Jason Cupitt; Maria-Teresa Cutino-Moguel; Ana da Silva Filipe; Jo Dalton; Paul Dark; Christopher Davis; Chris Dawson; Thushan de Silva; Samir Dervisevic; Oslem Dincarslan; Alejandra Doce Carracedo; Annemarie B Docherty; Cara Donegan, LLM; Lorna Donnelly; Phil Donnison; Chloe Donohue; Gonçalo dos Santos Correia, PhD; Sam Douthwaite; Thomas M Drake; Andrew Drummond; Marc-Emmanuel Dumas, PhD; Chris Dunn; Jake Dunning; Ingrid DuRand; Ahilanadan Dushianthan; Philip Dyer; Tristan Dyer; Angela Elliott; Anthony Evans; Cariad Evans; Chi Eziefula; Cameron J Fairfield; Angie Fawkes; Chrisopher Fegan; Lorna Finch; Adam Finn; Lewis WS Fisher; Lisa Flaherty; Tom Fletcher; Terry Foster; Duncan Fullerton; Carrol Gamble; Isabel Garcia-Dorival; Sanjeev Garg; Sanjeev Garg; Atul Garg; Tammy Gilchrist; Michelle Girvan; Effrossyni Gkrania-Klotsas; Jo Godden; Arthur Goldsmith; Clive Graham; Christopher A Green; William Greenhalf; Julian L Griffin, PhD; Fiona Griffiths; Philip Gunning; Rishi K Gupta, MRCP; Katarzyna Hafezi; Sophie Halpin; Hayley Hardwick; Elaine Hardy; Ewen M Harrison; Janet Harrison; Catherine Hartley; Stuart Hartshorn; Daniel Harvey; Peter Havalda; Daniel B Hawcutt; Ross Hendry; Julian A Hiscox; Antonia Ying Wai Ho; Maria Hobrok; Luke Hodgson; Anthony Holmes; Peter W Horby; Anil Hormis; Samreen Ijaz; Clare Jackson; Michael Jacobs; Susan Jain; Paul Jennings; Rebecca L Jensen; Christopher B Jones; Trevor R Jones; Agilan Kaliappan; Vidya Kasipandian; Seán Keating; Stephen Kegg; Michael Kelsey; Jason Kendall; Caroline Kerrison; Ian Kerslake; Shadia Khandaker; Saye Khoo; Katharine King; Robyn T. Kiy; Paul Klenerman, PhD; Stephen R Knight; Susan Knight; Oliver Koch; Gouri Koduri; George Koshy; Chrysa Koukorava; Shondipon Laha; Eva Lahnsteiner; Steven Laird; Annette Lake; Suzannah Lant; Susan Larkin; Diane Latawiec; Lara Lavelle-Langham; Andrew Law; Andrew Law; James Lee; Gary Leeming; Daniella Lefteri; Tamas Leiner; Lauren Lett; Matthew R Lewis, PhD; Sonia Liggi, PhD; Patrick Lillie; Wei Shen Lim; James Limb; Vanessa Linnett; Jeff Little; Lucia A Livoti; Mark Lyttle; Louise MacGillivray; Alan Maclean; Michael MacMahon; Emily MacNaughton; Maria Mancini; Ravish Mankregod; Laura Marsh; Lynn Maslen, PhD; Hannah Massey; Huw Masson; Elijah Matovu; Nicole Maziere; Sarah McCafferty; Katherine McCullough; Sarah E McDonald; Sarah McDonald; Laurence McEvoy; Ruth McEwen; John McLauchlan; Kenneth A Mclean; Manjula Meda; Alexander J Mentzer; Laura Merson; Soeren Metelmann; Alison M Meynert; Nahida S Miah; Joanna Middleton; Gary Mills; Jane Minton; Mariyam Mirfenderesky; Joyce Mitchell; Kavya Mohandas; Quen Mok; James Moon; Shona C Moore; Shona C Moore; Elinoor Moore; Patrick Morgan; Kirstie Morrice; Craig Morris; Katherine Mortimore; Samuel Moses; Mbiye Mpenge; Rohinton Mulla; Derek

Murphy; Ellen G Murphy; Lee Murphy; Michael Murphy; Thapas Nagarajan; Megan Nagel; Mark Nelson; Lisa Norman ; Lucy Norris; Lillian Norris; Mahdad Noursadeghi; Matthew K. O'Shea; Michael Olanipekun,MRes; Wilna Oosthuyzen; Anthonia Osagie,MSc; Marlies Ostermann; Igor Otahal; Mark Pais; Massimo Palmarini ; Carlo Palmieri,PhD; Carlo Palmieri; Selva Panchatsharam; Danai Papakonstantinou; Padmasayee Papineni; Hassan Paraiso; Brij Patel; Natalie Pattison; William A Paxton; Rebekah Penrice-Randal; Justin Pepperell; Mark Peters; Mandeep Phull; Jack Pilgrim; Stefania Pintus; Riinu Pius; Tim Planche; Daniel Plotkin; Georgios Pollakis; Frank Post; Nicholas Price; David Price; Tessa Prince; Rachel Prout; Nikolas Rae; Andrew Rambaut,D.Phil; Henrik Reschreiter; Will Reynolds; Tim Reynolds; Neil Richardson; P. Matthew Ridley; Stephanie Roberts; Mark Roberts; Devender Roberts; David L Robertson; Alistair Rose; Guy Rousseau; Bobby Ruge; Clark D Russell; Brendan Ryan; Debby Sales; Taranprit Saluja; Vanessa Sancho-Shimizu; Caroline J Sands,PhD; Sarah Cole; Egle Saviciute; Matthias L Schmid; Janet T Scott,PhD; James Scott-Brown; Aarti Shah; Manu Shankar-Hari; Prad Shanmuga; Anil Sharma; Catherine A Shaw; Victoria Shaw; Victoria E Shaw; Anna Shawcross; Rebecca K Shears; Louise Sigfrid; Jagtur Singh Pooni; Jeremy Sizer; Benjamin Small; Richard Smith; Catherine Snelson; Tom Solomon; Rebecca G. Spencer,LLM; Nick Spittle; Shiranee Sriskandan; Nikki Staines; Tom Stambach; Richard Stewart; David Stuart; Krishanthi S Subramaniam; Pradeep Subudhi; Charlotte Summers; Olivia V Swann,PhD; Tamas Szakmany; Agnieska Szemiel; Aislynn Taggart; Sarah Tait; Zoltan Takats,PhD; Panteleimon Takis,PhD; Jolanta Tanianis-Hughes; Kate Tatham; Richard S Tedder; Jordan Thomas; Jo Thomas; AA Roger Thompson; Chris Thompson; Robert Thompson; Emma C Thomson; Ryan S Thwaites; Ascanio Tridente; Erwan Trochu; Darell Tupper-Carey; Lance CW Turtle; Mary Twagira; Nick Vallotton; Libby van Tonder; Rama Vancheeswaran; Lisa Vincent-Smith; Shico Visuvanathan; Alan Vuylsteke; Sam Waddy; Rachel Wake; Andrew Walden; Ingeborg Welters; Murray Wham; Tony Whitehouse; Paul Whittaker; Ashley Whittington; Meme Wijesinghe; Eve Wilcock; Martin Williams; Lawrence Wilson; Stephen Winchester; Martin Wiselka; Adam Wolverson; Daniel G Wootton; Andrew Workman; Nicola Wrobel; Bryan Yates; Peter Young; Maria Zambon,PhD ; J. Eunice Zhang
